# Supplementary material for: SIDT1-dependent absorption in the stomach mediates host uptake of dietary and orally administered microRNAs
Source: PubMed Central journal article supplement (PMC8026584; doi:10.1038/s41422-020-0389-3), 2020-08-17
Supplement: 41422_2020_389_MOESM1_ESM.pdf [file 41422_2020_389_MOESM1_ESM.pdf]

## Supplementary information, Figure S1

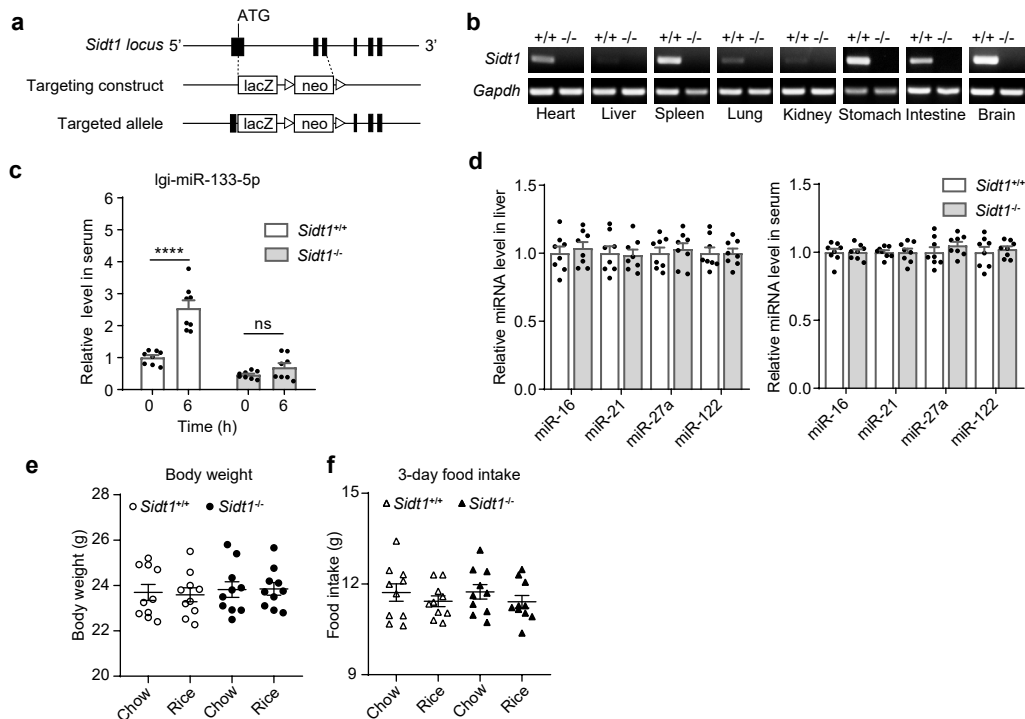

**Fig. S1** Validation and characterization of *Sidt1* knockout mice. **a**, Diagram of the *Sidt1* gene knock-out. The first three exons of *Sidt1* were replaced with a LacZ gene and a floxed neo gene by homologous recombination. **b**, The knockout efficiency of *Sidt1* gene was validated by RT-PCR. *Sidt1* mRNA was undetectable in *Sidt1*<sup>-/-</sup> mice tissues. **c**, The lgi-miR-133-5p level in mouse serum following gavage feeding with synthetic lgi-miR-133-5p (n=8 ± SEM). Two-way ANOVA analysis with Sidak's *post hoc* test; ns, not significant, \*\*\*\* *P* < 0.0001. **d**, The levels of endogenous miRNAs detected by RT-qPCR in the liver or serum from *Sidt1*<sup>+/+</sup> or *Sidt1*<sup>-/-</sup> mice (n=8 ± SEM). **e**, The body weight of mice fed with chow or rice (n=10 ± SEM). **f**, The food intake of chow or rice (n=10 ± SEM).
