# Supplementary material for: SIDT1-dependent absorption in the stomach mediates host uptake of dietary and orally administered microRNAs
Source: PubMed Central journal article supplement (PMC8026584; doi:10.1038/s41422-020-0389-3), 2020-08-17
Supplement: 41422_2020_389_MOESM2_ESM.pdf [file 41422_2020_389_MOESM2_ESM.pdf]

## Supplementary information, Figure S2

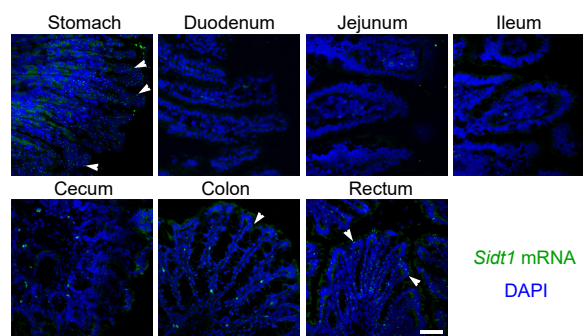

**Fig. S2** Characterization of tissue distribution of mouse *Sidt1* mRNA. The *in situ* hybridization signals (green puncta, indicated by arrowhead) of *Sidt1* mRNA in mouse GI tract tissues. Scale bar, 50  $\mu$ m.
