# Supplementary material for: SIDT1-dependent absorption in the stomach mediates host uptake of dietary and orally administered microRNAs
Source: PubMed Central journal article supplement (PMC8026584; doi:10.1038/s41422-020-0389-3), 2020-08-17
Supplement: 41422_2020_389_MOESM3_ESM.pdf [file 41422_2020_389_MOESM3_ESM.pdf]

### Supplementary information, Figure S3

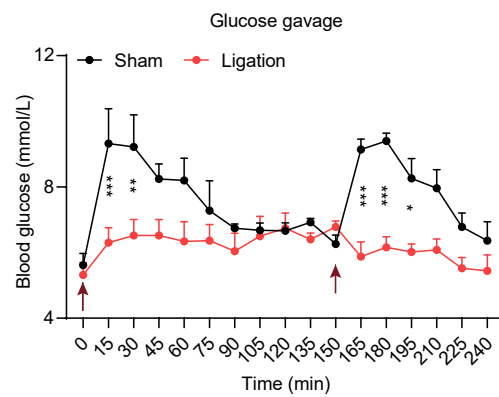

**Fig. S3** Blood glucose monitoring to validate the pylorus ligation operation.

The blood glucose levels of the sham and pylorus-ligated mice were monitored at 15 min intervals for 240 min between and after twice glucose gavage (pointed by the arrow) ( $n=5 \pm \text{SEM}$ ). Two-way ANOVA analysis with Sidak's *post hoc* test; \* $P<0.05$ , \*\* $P<0.01$ , \*\*\* $P<0.001$ .
