# Supplementary material for: SIDT1-dependent absorption in the stomach mediates host uptake of dietary and orally administered microRNAs
Source: PubMed Central journal article supplement (PMC8026584; doi:10.1038/s41422-020-0389-3), 2020-08-17
Supplement: 41422_2020_389_MOESM4_ESM.pdf [file 41422_2020_389_MOESM4_ESM.pdf]

### Supplementary information, Figure S4

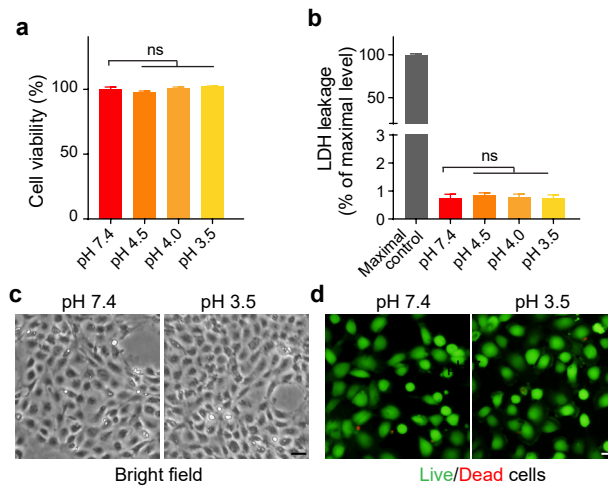

**Fig. S4** Analysis of the cytotoxicity of acidic conditions on PGECs. **a**, Cell viability assay, the cell viabilities were examined by CCK-8 assay kit after 30-min exposure to different low pH conditions ( $n=12 \pm \text{SEM}$ ). One-way ANOVA analysis with Tukey's *post hoc* test; ns, not significant. **b**, LDH cytotoxicity assay, the LDH released into the culture supernatant by cells was detected 1 h after 30-min exposure to different low pH conditions ( $n=12 \pm \text{SEM}$ ), and the values are normalized with the maximal LDH release control group ( $n=6 \pm \text{SEM}$ ). One-way ANOVA analysis with Tukey's *post hoc* test; ns, not significant. **c**, Phase-contrast graphs of PGECs after incubation with the medium at pH 7.4 or 3.5 for 30 min. Scale bar, 10  $\mu\text{m}$ . **d**, Live/Dead cell staining, the fluorescence images of PGECs after incubation with the medium at pH 7.4 or 3.5 for 30 min. Scale bar, 10  $\mu\text{m}$ .
