# Supplementary material for: SIDT1-dependent absorption in the stomach mediates host uptake of dietary and orally administered microRNAs
Source: PubMed Central journal article supplement (PMC8026584; doi:10.1038/s41422-020-0389-3), 2020-08-17
Supplement: 41422_2020_389_MOESM5_ESM.pdf [file 41422_2020_389_MOESM5_ESM.pdf]

## Supplementary information, Figure S5

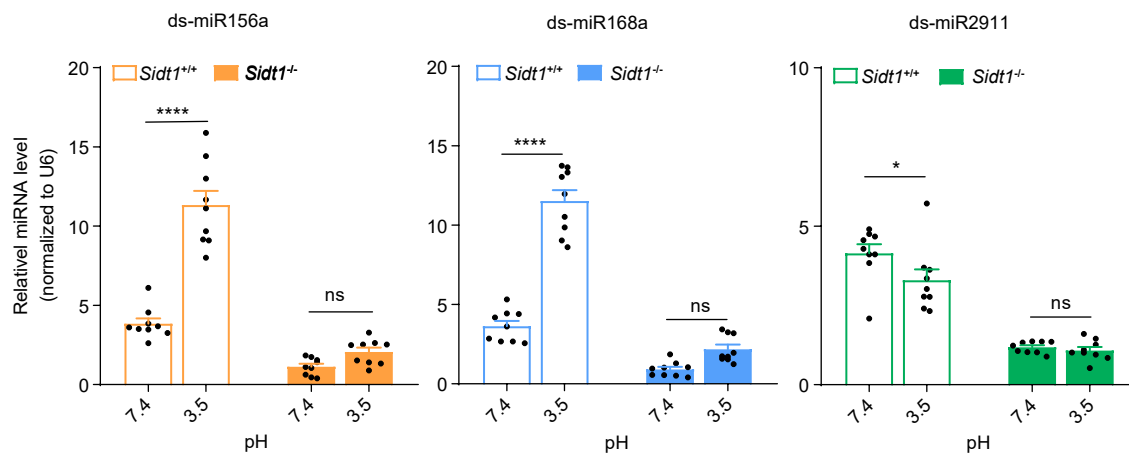

**Fig. S5** Double-stranded miRNA mimics are taken up by PGECs through SIDT1 in a pH-dependent manner. Uptake of double-stranded miRNAs (miR156a, miR168a and miR2911) by *Sidt1*<sup>+/+</sup> or *Sidt1*<sup>-/-</sup> PGECs after 30-min incubation of miRNA mimics at pH 7.4 and pH 3.5, quantified by RT-qPCR (n=9 ± SEM). Two-way ANOVA with Sidak's *post hoc* test; ns, not significant, \* P<0.05, \*\*\*\* P<0.0001.
