# Supplementary material for: SIDT1-dependent absorption in the stomach mediates host uptake of dietary and orally administered microRNAs
Source: PubMed Central journal article supplement (PMC8026584; doi:10.1038/s41422-020-0389-3), 2020-08-17
Supplement: 41422_2020_389_MOESM6_ESM.pdf [file 41422_2020_389_MOESM6_ESM.pdf]

## Supplementary information, Figure S6

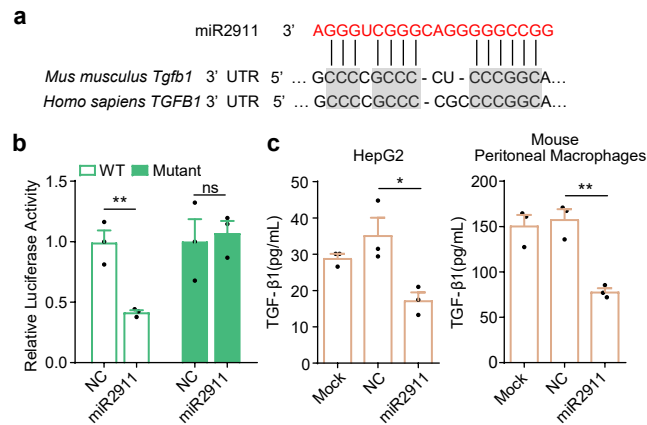

**Fig. S6** Identification of TGF- $\beta$ 1 as a target gene of miR2911 *in vitro*. **a**, Schematic description of the base pairing between miR2911 and TGF- $\beta$ 1 mRNA (mouse and human). **b**, Luciferase activity of HEK293T cells co-transfected with firefly luciferase reporters containing either WT or mutant TGF- $\beta$ 1 3'-UTR, and miR2911 or NC miRNA ( $n=3 \pm$  SEM). Two-tailed Student's *t*-test; ns, not significant,  $**P<0.01$ . **c**, The reduction of TGF- $\beta$ 1 expression by miR2911 incubation in HepG2 cells ( $n=3 \pm$  SEM) and mouse peritoneal macrophage cells ( $n=3 \pm$  SEM). One-way ANOVA analysis with Tukey's *post hoc* test;  $*P<0.05$ ,  $**P<0.01$ .
